# Supplementary material for: The Cardiovascular Risks of Fostamatinib in Patients with Rheumatoid Arthritis: A Systematic Review and Meta-Analysis
Source: PubMed Central journal article supplement (PMC8327174; doi:10.3389/fphar.2021.632551), 2021-07-19
Supplement: datasheet2.pdf [file datasheet2.pdf]

## **Detailed Search Strategy**

### **The cardiovascular risks of fostamatinib in patients with rheumatoid arthritis : a systematic review and meta-analysis**

Yuehong Chen, Huan Liu, Yupeng Huang, Sang Lin, Geng Yin\*, Qibing Xie#

Department of Rheumatology and Immunology, West China Hospital, Sichuan University, Chengdu 610041, China

\* Co-corresponding author, email: yingeng1975@163.com, Department of Rheumatology and Immunology, West China Hospital, Sichuan University, 37 Guoxue lane, Chengdu 610041, China, Tel/Fax: +86-28-8542 2393

# Corresponding author, email: xieqibing1971@163.com, Department of Rheumatology and Immunology, West China Hospital, Sichuan University, 37 Guoxue lane, Chengdu 610041, China, Tel/Fax: +86-28-8542 2393

Search date July 3, 2020

Ovid MEDLINE(R) 1946 to June Week 4 2020 (n=118)

Ovid EMBASE 1974 to 2020 July 02 (n=269)

Web of science n=127

Cochrane libraey n=44

**Database: Ovid MEDLINE(R) <1946 to June Week 4 2020>**

Search Strategy:

1 rheumatoid arthritis.mp. or exp Arthritis, Rheumatoid/

2 ((rheumatoid or reumatoid or revmatoid or rheumatic or reumatic or revmatic or rheumat\$ or reumat\$ or revmarthrit\$) adj3 (arthrit\$ or artrit\$ or diseas\$ or condition\$ or nodule\$)).tw.

3 (felty\$ adj2 syndrome).tw.

4 (caplan\$ adj2 syndrome).tw.

5 (sjogren\$ adj2 syndrome).tw.

6 (sicca adj2 syndrome).tw.

7 still\$ disease.tw.

8 bechterew\$ disease.tw.

9 1 or 2 or 3 or 4 or 5 or 6 or 7 or 8

10 Fostamatinib.mp.

11 Fostamatinib Disodium.mp.

12 Syk Kinase/

13 Tavalisse.mp.

14 Masitinib.mp.

15 AB1010.mp.

16 ab1010.mp.

17 AB 1010.mp.

18 ab 1010.mp.

19 AB-1010.mp.

20 UNII-M59NC4E26P.mp.

21 R-788.mp.

22 r-788.mp.

23 R 788.mp.

24 R788.mp.

25 tamatinib fosdium.mp.

26 R935788.mp.

27 R 935788.mp.

28 R-935788.mp.

29 R-788\$400.mp.

30 R 788\$400.mp.

31 R788\$400.mp.

32 10 or 11 or 12 or 13 or 14 or 15 or 16 or 17 or 18 or 19 or 20 or 21 or 22 or 23 or 24 or 25 or 26 or 27 or 28 or 29 or 30 or 31

~~34~~ 9 and 32

33

**Database: Embase <1974 to 2020 July 02>**

Search Strategy:

- 1 rheumatoid arthritis.mp. or exp rheumatoid arthritis/
- 2 ((rheumatoid or reumatoid or revmatoid or rheumatic or reumatic or revmatic or rheumat\$ or reumat\$ or revmarthrit\$) adj3 (arthrit\$ or artrit\$ or diseas\$ or condition\$ or nodule\$)).tw.
- 3 (felty\$ adj2 syndrome).tw.
- 4 (caplan\$ adj2 syndrome).tw.
- 5 (sjogren\$ adj2 syndrome).tw.
- 6 (sicca adj2 syndrome).tw.
- 7 still\$ disease.tw.
- 8 bechterew\$ disease.tw.
- 9 1 or 2 or 3 or 4 or 5 or 6 or 7 or 8
- 10 Fostamatinib.mp. or exp fostamatinib/
- 11 Fostamatinib Disodium.mp.
- 12 Tavalisse.mp.
- 13 Masitinib.mp.
- 14 AB1010.mp.
- 15 ab1010.mp.
- 16 AB 1010.mp.
- 17 ab 1010.mp.
- 18 AB-1010.mp.
- 19 UNII-M59NC4E26P.mp.
- 20 R-788.mp.
- 21 r-788.mp.
- 22 R 788.mp.
- 23 R788.mp.
- 24 tamatinib fosdium.mp.
- 25 R935788.mp.
- 26 R 935788.mp.
- 27 R-935788.mp.
- 28 R-788-400.mp.
- 29 R-788\$400.mp.
- 30 R 788\$400.mp.
- 31 R788\$400.mp.
- 32 10 or 11 or 12 or 13 or 14 or 15 or 16 or 17 or 18 or 19 or 20 or 21 or 22 or 23 or 24 or 25 or 26 or 27 or 28 or 29 or 30 or 31
- 33 9 and 32

**Database: Web of science (1900-2020)**

1 TS=(rheumatoid arthritis)

2 ALL=((rheumatoid or reumatoid or revmatoid or rheumatic or reumatic or revmatic or rheumat\$ or reumat\$ or revmarthrit\$) adj3 (arthrit\$ or artrit\$ or diseas\$ or condition\$ or nodule\$)).tw. )

3 1 or 2

4 TS=(Fostamatinib)

5 TS=(Fostamatinib Disodium)

6 ALL=(Fostamatinib)

7 ALL=(Tavalisse)

8 ALL=(Masitinib)

9 ALL=(AB1010)

10 ALL=(AB 1010)

11 ALL=(AB-1010)

12 ALL=(R-788)

13 ALL=(R 788)

14 ALL=(R788)

15 ALL=(tamatinib fosdium)

16 ALL=(Fostamatinib Disodium)

17 ALL=(R935788)

18 ALL=(R 935788)

19 ALL=( R-935788)

20 ALL=( R-788-400)

21 ALL=(R-788\$400)

22 ALL=(R 788\$400)

23 ALL=(R788\$400)

24 ALL=()

25 4 or 5 or 6 or 7 or 8 or 9 or 10 or 11 or 12 or 13 or 14 or 15 or 16 or 17 or 18 or 19 or 20 or 21 or 22 or 23 or 24

26 3 and 25

## **Cochrane library**

- 1 MeSH descriptor: [Arthritis, Rheumatoid] explode all trees
- 2 (rheumatoid arthritis):ti,ab,kw
- 3 (felty\$ adj2 syndrome):ti,ab,kw
- 4 (caplan\$ adj2 syndrome):ti,ab,kw
- 5 (sjogren\$ adj2 syndrome):ti,ab,kw
- 6 (sicca adj2 syndrome):ti,ab,kw
- 7 still\$ disease:ti,ab,kw
- 8 bechterew\$ disease:ti,ab,kw
- 9 1 or 2 or 3 or 4 or 5 or 6 or 7 or 8
- 10 (Fostamatinib):ti,ab,kw
- 11 (Fostamatinib Disodium):ti,ab,kw
- 12 (Tavalisse):ti,ab,kw
- 13 (Masitinib):ti,ab,kw
- 14 (AB1010):ti,ab,kw
- 15 (ab1010):ti,ab,kw
- 16 (AB 1010):ti,ab,kw
- 17 (ab 1010):ti,ab,kw
- 18 (AB-1010):ti,ab,kw
- 19 (R-788):ti,ab,kw
- 20 (r-788):ti,ab,kw
- 21 (R 788):ti,ab,kw
- 22 (R788):ti,ab,kw
- 23 (tamatinib fosdium):ti,ab,kw
- 24 (R935788):ti,ab,kw
- 25 (R 935788):ti,ab,kw
- 26 (R-935788):ti,ab,kw
- 27 (R-788-400):ti,ab,kw
- 28 (R-788\$400):ti,ab,kw
- 29 (R 788\$400):ti,ab,kw
- 30 (R788\$400):ti,ab,kw
- 31 10 or 11 or 12 or 13 or 14 or 15 or 16 or 17 or 18 or 19 or 20 or 21 or 22 or 23  
or 24 or 25 or 26 or 27 or 28 or 29 or 30
- 32 9 and 31
